# Supplementary material for: Safety and Effectiveness of Isavuconazole Treatment for Fungal Infections in Solid Organ Transplant Recipients (ISASOT Study)
Source: PubMed Central journal article supplement (PMC8849063; doi:10.1128/spectrum.01784-21), 2022-02-16
Supplement: spectrum01784-21_supp_1_seq3.pdf [file spectrum01784-21_supp_1_seq3.pdf]

## SUPPLEMENTARY MATERIAL

Supplementary table 1: Fungal isolates and secondary outcomes in lung transplant recipients and other SOTR.

|                                  | Lung transplant recipients<br>(n = 44)                                    | Kidney, liver and<br>combined transplant<br>recipients<br>(n = 9)                 | All SOTR<br>(n = 53)                            |
|----------------------------------|---------------------------------------------------------------------------|-----------------------------------------------------------------------------------|-------------------------------------------------|
| <b>Identified fungal species</b> | <b>45 species in 35 lung<br/>transplant recipients</b>                    | <b>7 species in 9 kidney, liver<br/>and combined transplant<br/>recipients</b>    | <b>53 species in<br/>44 SOTR</b>                |
| <i>Aspergillus</i> spp           | 36 (80)                                                                   | 7 (100)                                                                           | 43 (82.7)                                       |
| <i>A. flavus</i>                 | 14 (38.9)                                                                 | 2 (28.6)                                                                          | 16 (30.2)                                       |
| <i>A. terreus</i>                | 11 (30.6)                                                                 | 0 (0)                                                                             | 11 (20.8)                                       |
| <i>A. fumigatus</i>              | 8 (17.8)                                                                  | 4 (57.1)                                                                          | 12 (22.6)                                       |
| Other <i>Aspergillus</i> spp     | 3 (6.7)                                                                   | 1 (14.3)                                                                          | 4 (7.6)                                         |
| <i>Mucormycosis</i>              | 1 (2.2)                                                                   | 0 (0)                                                                             | 1 (1.9)                                         |
| Other filamentous fungi          | 5 (11.1)                                                                  | 0 (0)                                                                             | 5 (9.4)                                         |
| Yeasts                           | 4 (8.9)                                                                   | 0 (0)                                                                             | 4 (7.5)                                         |
| <i>Trichosporon asahii</i>       | 2 (4.5)                                                                   | 0 (0)                                                                             | 2 (3.8)                                         |
| <i>Candida albicans</i>          | 1 (2.2)                                                                   | 0 (0)                                                                             | 1 (1.9)                                         |
| <i>Saccharomyces cerevisiae</i>  | 1 (2.2)                                                                   | 0 (0)                                                                             | 1 (1.9)                                         |
| <b>No fungal isolate</b>         | <b>6</b>                                                                  | <b>3</b>                                                                          | <b>9 SOTR</b>                                   |
| <b>Type of FI<sup>a</sup></b>    | <b>45 infections in 44<br/>lung transplant<br/>recipients<sup>b</sup></b> | <b>9 infections in 9 kidney,<br/>liver and combined<br/>transplant recipients</b> | <b>54 infections in<br/>53 SOTR<sup>b</sup></b> |
| Tracheobronchitis                | 22 (48.9)                                                                 | 3 (33.3)                                                                          | 25 (46.3)                                       |
| Fungal pneumonia                 | 7 (15.6)                                                                  | 0 (0)                                                                             | 7 (13)                                          |
| Bronchial anastomotic infection  | 2 (4.4)                                                                   | 0 (0)                                                                             | 2 (3.7)                                         |
| Other:                           |                                                                           |                                                                                   |                                                 |
| Micotoma                         | 5 (11.1)                                                                  | 1 (11.1)                                                                          | 6 (11.1)                                        |
| Cutaneous infection              | 3 (6.7)                                                                   | 0 (0)                                                                             | 3 (5.6)                                         |
| Disseminated FI                  | 1 (2.2)                                                                   | 1 (11.1)                                                                          | 2 (3.7)                                         |
| Osteomyelitis                    | 1 (2.2)                                                                   | 0 (0)                                                                             | 1 (1.9)                                         |
| Chronic otitis media             | 0 (0)                                                                     | 1 (11.1)                                                                          | 1 (1.9)                                         |

|                                                                              |                                      |                                                           |                |
|------------------------------------------------------------------------------|--------------------------------------|-----------------------------------------------------------|----------------|
| Isolation in donor                                                           | 1 (2.2)                              | 0 (0)                                                     | 1 (1.9)        |
| No proven or probable FI                                                     | 3 (6.7)                              | 3 (33.3)                                                  | 6 (11.1)       |
| <b>Clinical cure at EOT</b>                                                  | 22 (50)                              | 5 (55.6)                                                  | 27 (50.9)      |
| <b>Culture conversion in patients with fungal species isolation (n = 44)</b> | <b>35 lung transplant recipients</b> | <b>9 kidney, liver and combined transplant recipients</b> | <b>44 SOTR</b> |
| Culture conversion at EOT                                                    | 14 (40)                              | 3 (33.3)                                                  | 17 (38.6)      |
| Fungal persistence at EOT                                                    | 14 (40)                              | 1 (11.1)                                                  | 15 (34.1)      |
| Cultures were not performed at EOT                                           | 7 (20)                               | 5 (55.6)                                                  | 12 (27.3)      |

<sup>a</sup>All cases were definite or probable fungal infection according to ISHLT and EORTC/MSGERC criteria except when indicated.

<sup>b</sup>One patient was treated for fungal tracheobronchitis and subcutaneous infection at the same time.

Data are expressed as numbers (%) unless otherwise indicated. EORTC/MSGERC, European Organization for Research and Treatment of Cancer and the Mycoses Study Group Education and Research Consortium; FI, fungal infection; ISHLT, International Society for Heart and Lung Transplantation; SOTR, solid organ transplant recipient.

Supplementary table 2: *Aspergillus* spp MIC and susceptibility rates to the antifungal agents tested (n = 43).

|                |           | <i>A. flavus</i><br>(n =16, 37.2%.<br>Fifteen MIC could be<br>assessed) | <i>A. fumigatus</i><br>(n =12 , 27.9%. Ten<br>MIC could be<br>assessed) | <i>A. terreus</i><br>(n =11, 25.6%. Ten<br>MIC could be<br>assessed) | <i>A. nidulans</i> (2),<br><i>A. niger</i> (1),<br><i>A. lentulus</i> (1) |
|----------------|-----------|-------------------------------------------------------------------------|-------------------------------------------------------------------------|----------------------------------------------------------------------|---------------------------------------------------------------------------|
| Isavuconazole  | MIC50     | 0.25                                                                    | 0.19                                                                    | 0.38                                                                 | 0.125                                                                     |
|                | MIC90     | 0.38                                                                    | 0.38                                                                    | 0.5                                                                  | NC                                                                        |
|                | IQR MIC50 | 0.125-0.38                                                              | 0.125-0.25                                                              | 0.19-0.5                                                             | 0.047-0.51                                                                |
| Voriconazole   | MIC50     | 0.25                                                                    | 0.125                                                                   | 0.38                                                                 | 0.125                                                                     |
|                | MIC90     | 0.5                                                                     | 0.25                                                                    | 1.5                                                                  | NC                                                                        |
|                | IQR MIC50 | 0,19-0.38                                                               | 0.125-0.25                                                              | 0.25-0.5                                                             | 0.094-0.19                                                                |
| Posaconazole   | MIC50     | 0.25                                                                    | 0.125                                                                   | 0.094                                                                | 0.38                                                                      |
|                | MIC90     | 0.5                                                                     | 0.38                                                                    | 0.38                                                                 | NC                                                                        |
|                | IQR MIC50 | 0.19-0.38                                                               | 0.064-0.25                                                              | 0.064-0.25                                                           | 0.19-0.5                                                                  |
| Amphotericin B | MIC50     | 4                                                                       | 0.38                                                                    | 2                                                                    | 1                                                                         |
|                | MIC90     | 12                                                                      | 2                                                                       | 30                                                                   | NC                                                                        |
|                | IQR MIC50 | 1.5-6                                                                   | 0.025-1                                                                 | 1.5-8                                                                | 0.38-4                                                                    |
| Anidulafungin  | MIC50     | 0.002                                                                   | 0.008                                                                   | 0.008                                                                | 0.016                                                                     |
|                | MIC90     | 0.006                                                                   | 0.047                                                                   | 0.03                                                                 | NC                                                                        |
|                | IQR MIC50 | 0.002-0.004                                                             | 0.003-0.03                                                              | 0.006-0.16                                                           | 0.004-0.064                                                               |
| Micafungin     | MIC50     | 0.003                                                                   | 0.012                                                                   | 0.007                                                                | 0.008                                                                     |
|                | MIC90     | 0.006                                                                   | 0.06                                                                    | 0.012                                                                | NC                                                                        |
|                | IQR MIC50 | 0.003-0.004                                                             | 0.006-0.016                                                             | 0.004-0.008                                                          | 0.006-0.047                                                               |

|             |           |             |             |             |             |
|-------------|-----------|-------------|-------------|-------------|-------------|
| Caspofungin | MIC50     | 0.032       | 0.125       | 0.094       | 0.094       |
|             | MIC90     | 0.125       | 0.19        | 0.25        | NC          |
|             | IQR MIC50 | 0.016-0.064 | 0.064-0.125 | 0.032-0.125 | 0.064-0.125 |

Data are expressed as numbers (%) unless otherwise indicated. IQR, interquartile range; MIC ( $\mu\text{g}/\text{dL}$ ), Minimum Inhibitory Concentration (MIC50 and MIC90 values were defined as the lowest concentration of the antifungal at which 50 and 90% of the isolates were inhibited); NC, Not Calculated; S%, susceptibility percentage of isolates according to antifungal breakpoints established by CLSI.

Supplementary table 3: non *Aspergillus* species MIC to antifungal agents tested (n = 10)

|                                                                                                                                          | ISA                                              | VOR   | POS  | AMPB | ANID  | MICA  | CASP  |
|------------------------------------------------------------------------------------------------------------------------------------------|--------------------------------------------------|-------|------|------|-------|-------|-------|
| <i>Candida albicans</i>                                                                                                                  |                                                  | 0.008 |      | 1    | 0.015 | 0.125 | 0.125 |
| <i>Trichosporon asahii</i>                                                                                                               | 0.094                                            | 0.06  | 0.25 | 0.5  | 32    | 32    | 32    |
| <i>Lomentospora prolificans</i>                                                                                                          | 32                                               | 32    | 32   | 32   | 32    | 32    | 32    |
| <i>Alternaria alternata</i>                                                                                                              | 8                                                | 8     | 8    | 2    | 0.03  | 0.06  | 0.5   |
| <i>Purpureocillium lilacinus</i>                                                                                                         | 0.25                                             | 0.125 | 0.38 | 32   | 32    | 32    | 32    |
| <i>Trichosporon asahii</i> , <i>Saccharomyces cerevisiae</i> , <i>Mucor</i> spp, <i>Diaporthe</i> spp, and unidentified new mold species | Antifungal susceptibility could not be performed |       |      |      |       |       |       |

MIC ( $\mu\text{g/dL}$ ) = minimum inhibitory concentration.

Supplementary table 4: Dosage and plasmatic levels of tacrolimus and m-TOR inhibitors after starting isavuconazole

|                            | Before start   | 1-2 days       | 4 days          | 7 days         | 10 days       | 14 days       |
|----------------------------|----------------|----------------|-----------------|----------------|---------------|---------------|
| Tacrolimus dose (mg)       | 4 (2-6)        | 3 (2-5.3)      | 2.3 (1.4-4)     | 2 (1.1-4)      | 2 (1.3-4)     | 2 (1-4)       |
|                            | n = 47         | n = 38         | n = 46          | n = 40         | n = 37        | n = 37        |
| Tacrolimus measured levels | 8.6 (5.7-11.4) | 7.4 (4.8-15.2) | 9.8 (5.7-15.2)  | 9.2 (4.8-10.9) | 7.9 (6.1-9.4) | 7.5 (5.6-10)  |
|                            | n = 47         | n = 28         | n = 34          | n = 24         | n = 27        | n = 28        |
| mTOR dose                  | 1.75 (1-2)     | 1 (1-2)        | 1 (0-1)         | 0.5 (0-1)      | 0.5 (0-1)     | 0.5 (0-1)     |
|                            | n = 7          | n = 7          | n = 7           | n = 7          | n = 7         | n = 7         |
| mTOR measured levels       | 5.2 (2.4-7.4)  | 4.2 (3-9)      | 11.6 (7.1-12.6) | 5.7 (3-9.4)    | 8.6           | 6.7 (4.4-7.3) |
|                            | n = 7          | n = 4          | n = 3           | n = 4          | n = 2         | n = 4         |

Data are expressed as median (IQR) unless otherwise indicated.

Supplementary table 5: Dosage and plasmatic levels of tacrolimus and m-TOR inhibitors after discontinuation of isavuconazole.

|                            | Initial       | 1-2 days       | 4 days         | 7 days         | 10 days       | 14 days        |
|----------------------------|---------------|----------------|----------------|----------------|---------------|----------------|
| Tacrolimus dose (mg)       | 3 (2-4)       | 4 (2-4.9)      | 4 (2-4)        | 4 (2-6)        | 4 (2-5.3)     | 4 (2-6)        |
|                            | n = 39        | n = 30         | n = 31         | n = 31         | n = 30        | n = 30         |
| Tacrolimus measured levels | 6.8 (5.1-10)  | 7.9 (5.3-12.1) | 9.3 (5.2-13.6) | 6.7 (4.7-12.6) | 7.3 (5.2-8.5) | 7.2 (5.2-10.6) |
|                            | n = 39        | n = 14         | n = 17         | n = 19         | n = 15        | n = 22         |
| mTOR dose (mg)             | 1 (0.5-2.8)   | 1.5 (0.8-3.5)  | 1.5 (0.8-3.5)  | 1.5 (0.8-3.5)  | 1.5 (0.8-3.5) | 1.5 (0.8-3.5)  |
|                            | n = 5         | n = 5          | n = 5          | n = 5          | n = 5         | n = 5          |
| mTOR measured levels       | 5.7 (2.7-7.6) | 7              | 5.1 (0.8-10.7) | 3              | 1.9           | 3.9            |
|                            | n = 4         | n = 1          | n = 3          | n = 2          | n = 2         | n = 2          |

Data are expressed as median (IQR) unless otherwise indicated.

Supplementary table 6: Evolution of SOTR treated with ISA

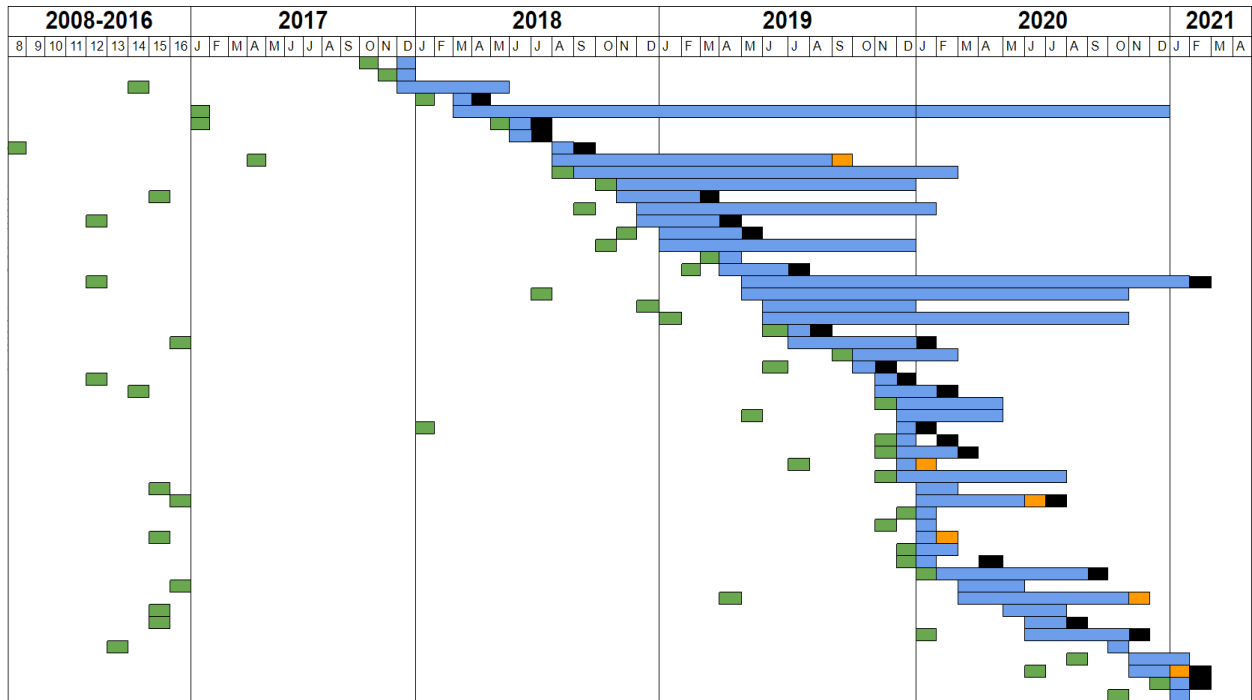

Black, deceased; Blue, duration of treatment with isavuconazole; Green, transplant date; Orange, discontinuation of treatment due to a clinically relevant adverse event. ISA, isavuconazole; SOTR, solid organ transplant recipient.
